# Supplementary material for: Urinary Incontinence and Weight Change During Pregnancy and Postpartum: A Cohort Study
Source: PubMed Central journal article supplement — Am J Epidemiol. 2010 Aug 20;172(9):1034–44. doi: 10.1093/aje/kwq240 (PMC2962255; doi:10.1093/aje/kwq240), 2010-08-20
Supplement: supp_kwq240_Questionnaire.pdf [file supp_kwq240_Questionnaire.pdf]

## Questionnaire 1, answered in week 15 of pregnancy

*Questions regarding urinary incontinence, translated from the Norwegian questionnaire:*

Do you leak urine when coughing, sneezing or laughing?

- Never
- Less than once a month
- Once or more per month
- Once or more per week
- Every day and/or every night

How much urine do you usually leak each time?

- Droplets
- Larger volumes

Do you leak urine when running or jumping?

- Never
- Less than once a month
- Once or more per month
- Once or more per week
- Every day and/or every night

How much urine do you usually leak each time?

- Droplets
- Larger volumes

Do you have urinary leakage with a strong urge to urinate?

- Never
- Less than once a month
- Once or more per month
- Once or more per week
- Every day and/or every night

How much urine do you usually leak each time?

- Droplets
- Larger volumes

Did you have urinary leakage before this pregnancy?

- Yes
- No

*Question regarding weight, translated from the Norwegian questionnaire:*

What was your weight at the time you became pregnant, and what is your weight now (in kilograms)?

When I became pregnant:       kg

Now:                                       kg

### Questionnaire 3, answered in week 30 of pregnancy

*Questions regarding urinary incontinence, translated from the Norwegian questionnaire:*

Do you leak urine when coughing, sneezing or laughing?

- Never
- Less than once a month
- Once or more per month
- Once or more per week
- Every day and/or every night

How much urine do you usually leak each time?

- Droplets
- Larger volumes

Do you leak urine when running or jumping?

- Never
- Less than once a month
- Once or more per month
- Once or more per week
- Every day and/or every night

How much urine do you usually leak each time?

- Droplets
- Larger volumes

Do you have urinary leakage with a strong urge to urinate?

- Never
- Less than once a month
- Once or more per month
- Once or more per week
- Every day and/or every night

How much urine do you usually leak each time?

- Droplets
- Larger volumes

*Question regarding weight, translated from the Norwegian questionnaire:*

How much did you weigh at your last antenatal check-up and when was it? (Refer to your health card.)

Weight □□□, □ kg

## Questionnaire 4, answered 6 months post partum

*Questions regarding urinary incontinence, translated from the Norwegian questionnaire:*

Do you leak urine when coughing, sneezing or laughing?

- Never
- Less than once a month
- Once or more per month
- Once or more per week
- Every day and/or every night

How much urine do you usually leak each time?

- Droplets
- Larger volumes

Do you leak urine when running or jumping?

- Never
- Less than once a month
- Once or more per month
- Once or more per week
- Every day and/or every night

How much urine do you usually leak each time?

- Droplets
- Larger volumes

Do you have urinary leakage with a strong urge to urinate?

- Never
- Less than once a month
- Once or more per month
- Once or more per week
- Every day and/or every night

How much urine do you usually leak each time?

- Droplets
- Larger volumes

*Question 75 regarding weight, translated from Norwegian questionnaire:*

What was your weight at the end of pregnancy, and what is your weight now?

Weight at end of pregnancy: □□□,□ kg

Weight now: □□□,□ kg
